# Supplementary material
Source: publisher figshare collection journal article supplement (https://sage.figshare.com/ndownloader/files/20080055)

**Appendix**

**Table A1**: Definition of the measures utilized for the epidemiological study.

| **Table A1: Epidemiology Measures** | |
| --- | --- |
|  |  |
| **Injuries per 1000 hours of Serie A match play:** | total number of injuries occurred during Serie A matches divided for total number of hours played by each player in every match of the Serie A (1.5 hour per player, 22 players per match, 10 matches per round, 38 rounds per season) x 1000 |
| **Injuries per 1000 hours of Cup match play:** | total number of injuries occurred during Cup (Champions League, Europa League, National Cup) matches divided for total number of hours played by each player in every Cup match based on the number of matches played by each team in each season x 1000 |
| **Injuries per 1000 hours of total match play:** | total number of injuries occurred during Serie A and Cup matches divided for total number of hours played by each player in every Serie A and Cup matches x 1000 |
| **Injuries per 1000 hours of training:** | total number of injuries occurred during training divided for total number of hours of training of each player x 1000 |
| **Injuries per 1000 hours of total play:** | total number of injuries occurred during matches and training divided for total number of hours of match and training x 1000 |
| **Injury total incidence proportion:** | total number of injuries divided per total number of exposed players x 100. |
| **Injury incidence proportion in Serie A:** | total number of injuries occurred during Serie A matches divided per total number of exposed players x 100. |
| **Injury incidence proportion in Cups:** | total number of injuries occurred during Cups matches divided per total number of exposed players x 100. |
| **Injury incidence proportion in training:** | total number of injuries occurred during training divided per total number of exposed players x 100. |
| **Injury incidence proportion in National Representatives:** | total number of injuries occurred during involvement with National Representatives divided per total number of exposed players x 100. |
| **Injury incidence proportion per team:** | total number of injuries divided per the number of exposed teams x 100. |
| **Injuries per Serie A matches:** | total number of injuries occurred during Serie A matches divided per total number of Serie A matches played by each team. |
| **Injuries per Cup matches:** | total number of injuries occurred during Cups matches divided per total number of Cup matches played by each team. |
| **Injuries per total matches:** | total number of injuries occurred during Serie A and Cups matches divided per total number of Serie A and Cup matches played by each team. |
| **Number of Serie A matches every injury:** | 1/Injuries per Serie A matches, indicates every how many matches an ACL injury occurs on average in each team |
| **Number of Cup matches every injury:** | 1/Injuries per Cup matches, indicates every how many Cup matches an ACL injury occurs on average in each team |
| **Number of matches every injury:** | 1/Injuries per total A matches, indicates every how many matches an ACL injury occurs on average in each team |
|  |  |

**Table A2**: The various incidence proportions of ACL injury across the 7 seasons and in the overall stratified per represented per 100 players in different competitions, per team and per match.

| **Table A2: Incidence Proportion of ACL injuries within seasons** | | | | | | | | | | | | | | | | |
| --- | --- | --- | --- | --- | --- | --- | --- | --- | --- | --- | --- | --- | --- | --- | --- | --- |
| Seasons |  | Incidence proportion of ACL injuries per 100 players in | | | | | |  | Incidence proportion of ACL injuries | | | |  | Number of matches every ACL injury | | |
|  | Serie A Matchesa | Cups Matchesa | Traininga | National Teama |  | Totala |  | per Teama | per Serie A matcha | per Cups Matcha | per Total Matchesa |  | Serie A | Cups | Total Matches |
|  |  |  |  |  |  |  |  |  |  |  |  |  |  |  |  |  |
| Season 2011-2012 |  | 0.85% | 1.02% | 1.02% | 0.00% |  | 1.88% |  | 0.55 | 0.0066 | 0.0000 | 0.0058 |  | 152 | NA | 174 |
| Season 2012-2013 |  | 0.64% | 0.64% | 0.64% | 0.00% |  | 1.60% |  | 0.50 | 0.0053 | 0.0169 | 0.0068 |  | 190 | 59 | 146 |
| Season 2013-2014 |  | 0.98% | 0.98% | 0.98% | 0.16% |  | 2.30% |  | 0.70 | 0.0079 | 0.0091 | 0.0080 |  | 127 | 110 | 124 |
| Season 2014-2015 |  | 1.03% | 0.68% | 0.68% | 0,34% |  | 2.05% |  | 0.60 | 0.0079 | 0.0000 | 0.0067 |  | 127 | NA | 150 |
| Season 2015-2016 |  | 0.86% | 1.03% | 1.03% | 0.17% |  | 2.05% |  | 0.60 | 0.0066 | 0.0000 | 0.0058 |  | 152 | NA | 171 |
| Season 2016-2017 |  | 1.03% | 0.52% | 0.52% | 0.52% |  | 2.06% |  | 0.60 | 0.0079 | 0.0000 | 0.0069 |  | 127 | NA | 145 |
| Season 2017-2018 |  | 0.91% | 0.91% | 0.91% | 0.36% |  | 2.36% |  | 0.65 | 0.0066 | 0.0082 | 0.0068 |  | 152 | 122 | 147 |
|  |  |  |  |  |  |  |  |  |  |  |  |  |  |  |  |  |
| Total |  | 0.90% | 0.82% | 0.82% | 0.22% |  | 2.04% |  | 0.60 | 0.0070 | 0.0050 | 0.0067 |  | 144 | 201 | 149 |
|  |  |  |  |  |  |  |  |  |  |  |  |  |  |  |  |  |
| anon significant differences among the seasons (p<0.05) | | | | | | | | | | | | | | | | |

**Figure A1**: Number of injuries each season of the year (summer, autumn, winter, and spring), stratified based on the competition when the injury occurred: Serie A (green), training (dark blue), Cups (light blue) or national representative duty (yellow).


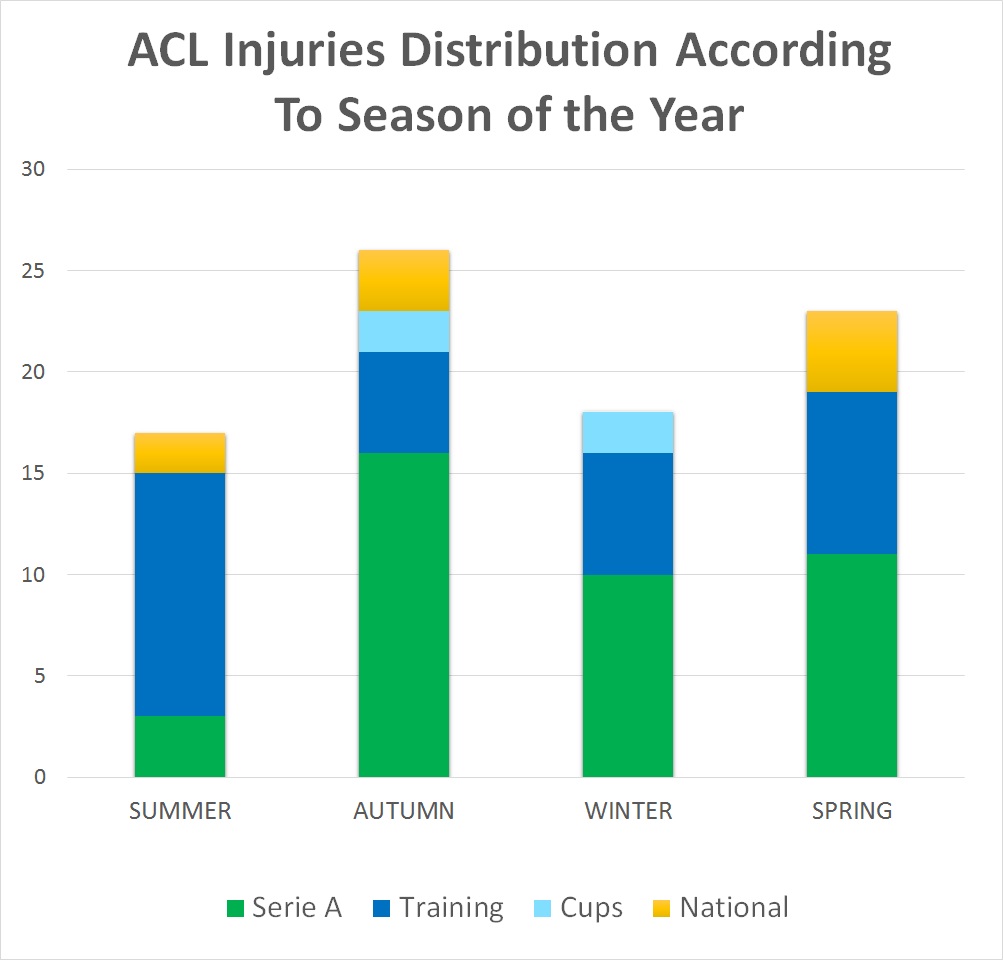

Supplement: Supplementary file 1 [file 20080055]
